# Supplementary material for: SOCS2 regulation of growth hormone signaling requires a canonical interaction with phosphotyrosine
Source: Oxford University Press journal article supplement (doi:10.1042/bsr20221683), 2022-11-18
Supplement: bsr-2022-1683_supp.pdf [file bsr-2022-1683_supp.pdf]

**Supplementary - SOCS2 regulation of growth hormone signaling requires a canonical interaction with phosphotyrosine**

Kunlun Li<sup>1,2</sup>, Lizeth G. Meza Guzman<sup>1,2</sup>, Lachlan Whitehead<sup>1,2</sup>, Evelyn Leong<sup>1</sup>, Andrew Kueh, Warren S. Alexander<sup>1,2</sup>, Nadia J. Kershaw<sup>1,2</sup>, Jeffrey J. Babon<sup>1,2</sup>, Karen Doggett<sup>1,2</sup>†, Sandra E. Nicholson<sup>1,2</sup>†

<sup>1</sup>The Walter and Eliza Hall Institute of Medical Research, Parkville, Australia;

<sup>2</sup>Department of Medical Biology, University of Melbourne, Parkville, Australia.

† These authors jointly supervised this work and are corresponding authors.

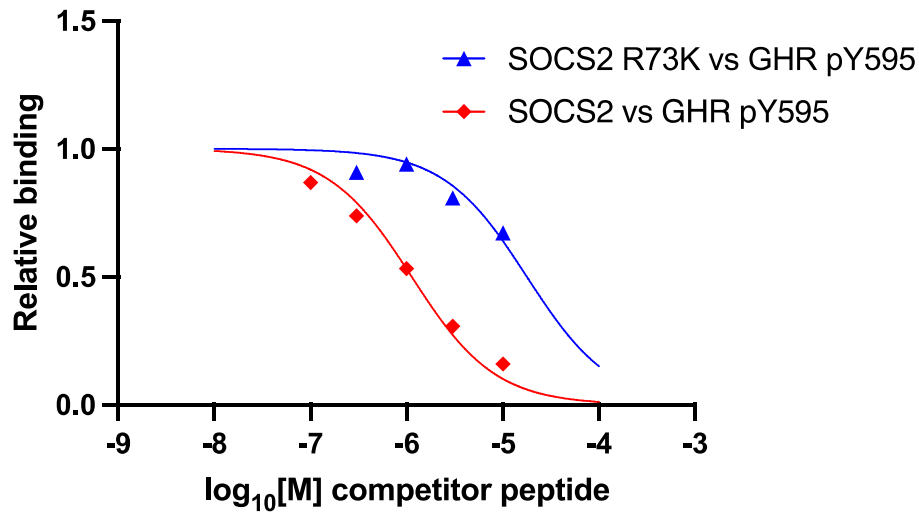

**Supplementary Figure 1. Mutation of Arg73 to Lys in the SOCS2-SH2 domain results in reduced binding to phosphopeptide.** A competitive surface plasmon resonance (SPR) assay was used to assess the impact of the R73K mutation. SOCS2 bound to a phosphopeptide derived from GHR pY595 with an  $IC_{50}$   $1.1 \pm 0.05 \mu\text{M}$ . The SOCS2-R73K mutation reduced binding to GHR pY595,  $IC_{50}$   $26.7 \pm 1.0 \mu\text{M}$ .  $IC_{50}$  values are mean  $\pm$  S.D., derived from three independent experiments.

### A SOCS2 WT

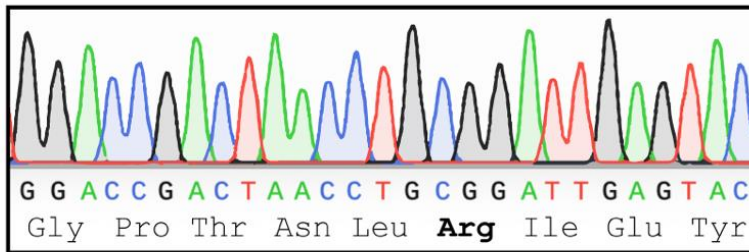

### B SOCS2 R96C

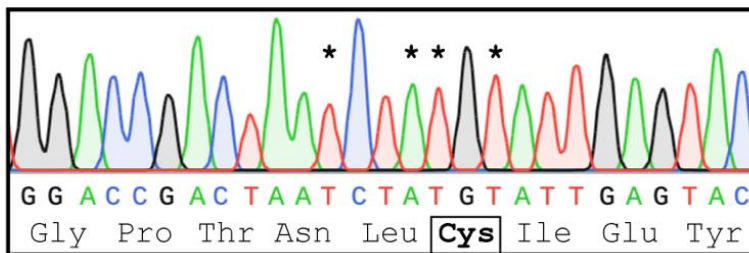

### C SOCS2 R96C PCR SOCS2 WT PCR

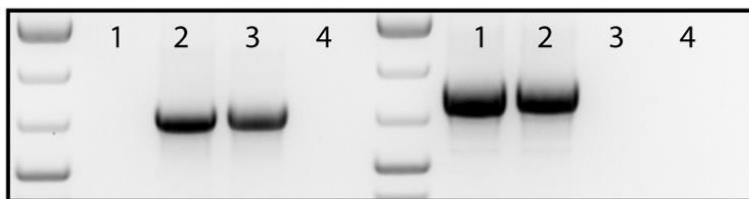

1. *Socs2*<sup>+/+</sup>
2. *Socs2*<sup>R96C/+</sup>
3. *Socs2*<sup>R96C/R96C</sup>
4. No template

**Supplementary Figure 2. Genotyping confirmation of the correct sequence change in the *Socs2*<sup>R96C</sup> mouse.** Sanger sequencing chromatograms confirming (A) the WT *Socs2* sequence and (B) the mutated *Socs2*<sup>R96C</sup> sequence (homozygous mutant allele). \*Highlights the CRISPR targeted base residue changes, two of which are synonymous and were introduced to enable primer specificity for standard gDNA genotyping. (C) Example 2% agarose gel confirming genotyping specificity by PCR. Primer sequences are available in **Supplementary Table 1**.

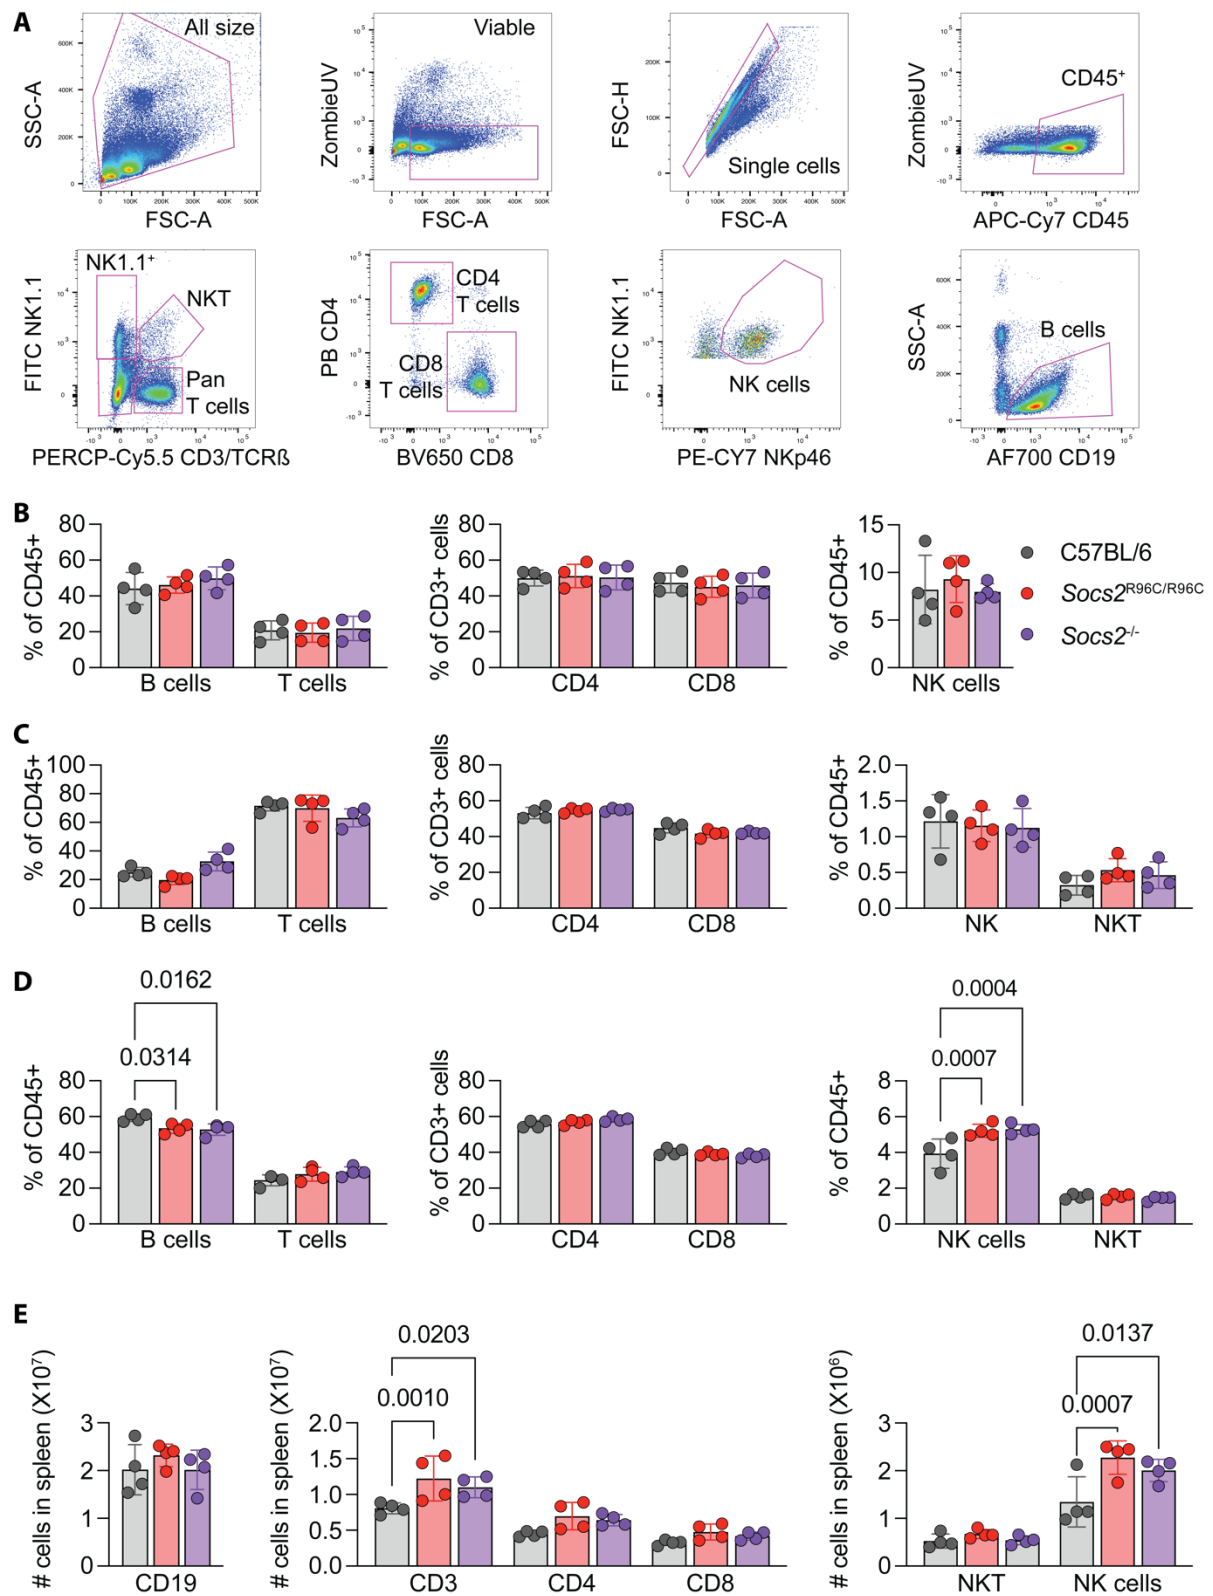

**Supplementary Figure 3. Homozygous *Socs2*<sup>R96C/R96C</sup> and *Socs2*<sup>-/-</sup> mice display increased numbers of splenic NK cells.** Single cell suspension peripheral blood mononuclear cells (PBMCs), splenocytes and lymphocytes from 8-12-week-old control C57BL/6 (black),

*Socs2*<sup>R96C/R96C</sup> (red) and *Socs2*<sup>-/-</sup> (purple) mice were stained with fluorescently conjugated antibodies to various immune markers and analysed by flow cytometry. **(A)** Example gating for the analysis of viable leukocytes (ZombieUV<sup>-</sup>CD45<sup>+</sup>), NKT (CD3<sup>+</sup>TCRβ<sup>+</sup>NK1.1<sup>+</sup>), Pan T cells (CD3<sup>+</sup>TCRβ<sup>+</sup>NK1.1<sup>-</sup>), CD4 T cells (CD3<sup>+</sup>TCRβ<sup>+</sup>NK1.1<sup>-</sup>CD4<sup>+</sup>), CD8 T cells (CD3<sup>+</sup>TCRβ<sup>+</sup>NK1.1<sup>-</sup>CD8<sup>+</sup>), Pan B cells (CD3<sup>-</sup>TCRβ<sup>-</sup>NK1.1<sup>-</sup>CD19<sup>+</sup>) and NK cells (CD3<sup>-</sup>TCRβ<sup>-</sup>NK1.1<sup>+</sup>NKp46<sup>+</sup>). Percentage of various immune populations in the **(B)** blood, **(C)** axial and inguinal lymph nodes, and **(D)** spleen. **(E)** Enumeration of immune populations in the spleen using counting beads (123count eBeads). **(B-E)** Each dot represents cells from an individual mouse. Significance determined by two-way ANOVA with Sidak's multiple comparisons test.

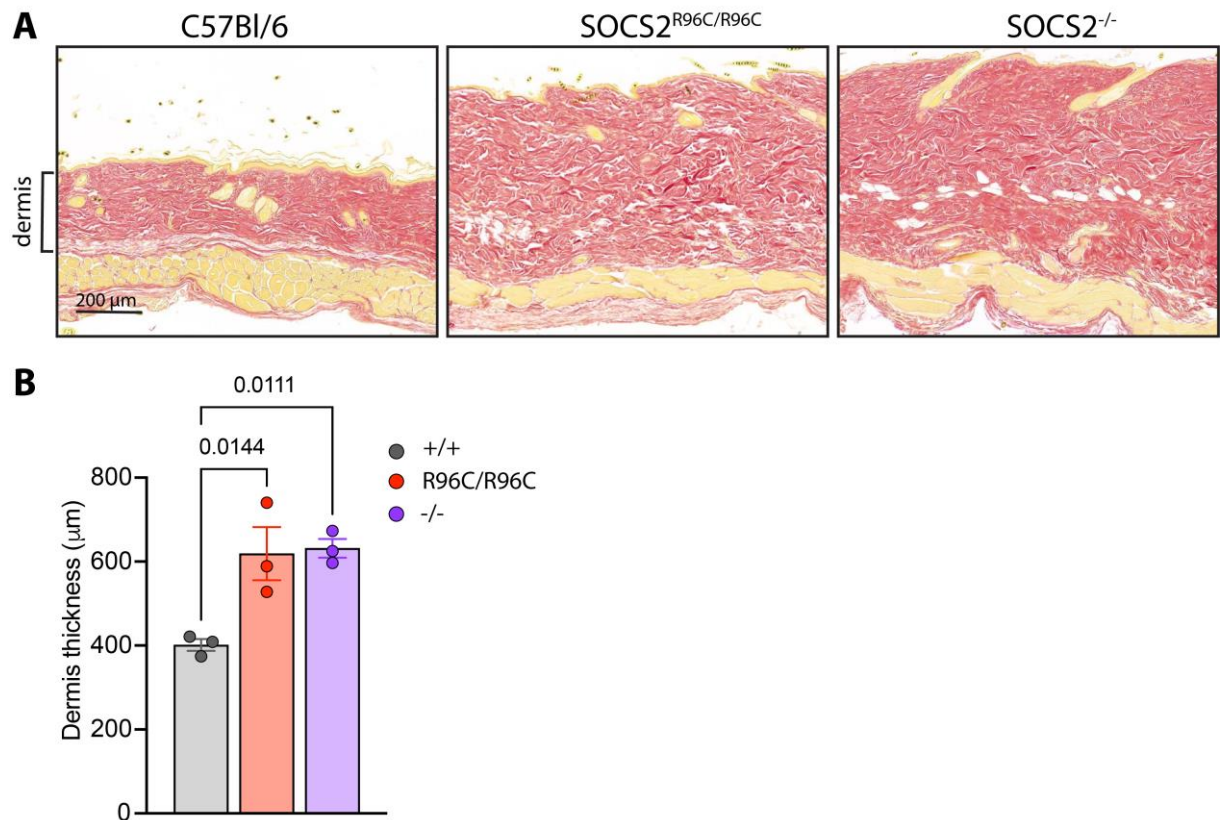

**Supplementary Figure 4. Homozygous *Socs2*<sup>R96C/R96C</sup> and *Socs2*<sup>-/-</sup> mice display thickening of the skin.** (A) Van Gieson-stained dorsal skin section from 10-week-old male WT, *Socs2*<sup>R96C/R96C</sup> and *Socs2*<sup>-/-</sup> mice. *Socs2* mutant and null mice show increased collagen deposits and a thickened dermis. Scale bar = 200 μm. Representative images of 3 mice of each genotype. (B) Quantification of dermis thickness. n=3 mice/genotype. Data were analyzed using a one-way ANOVA.

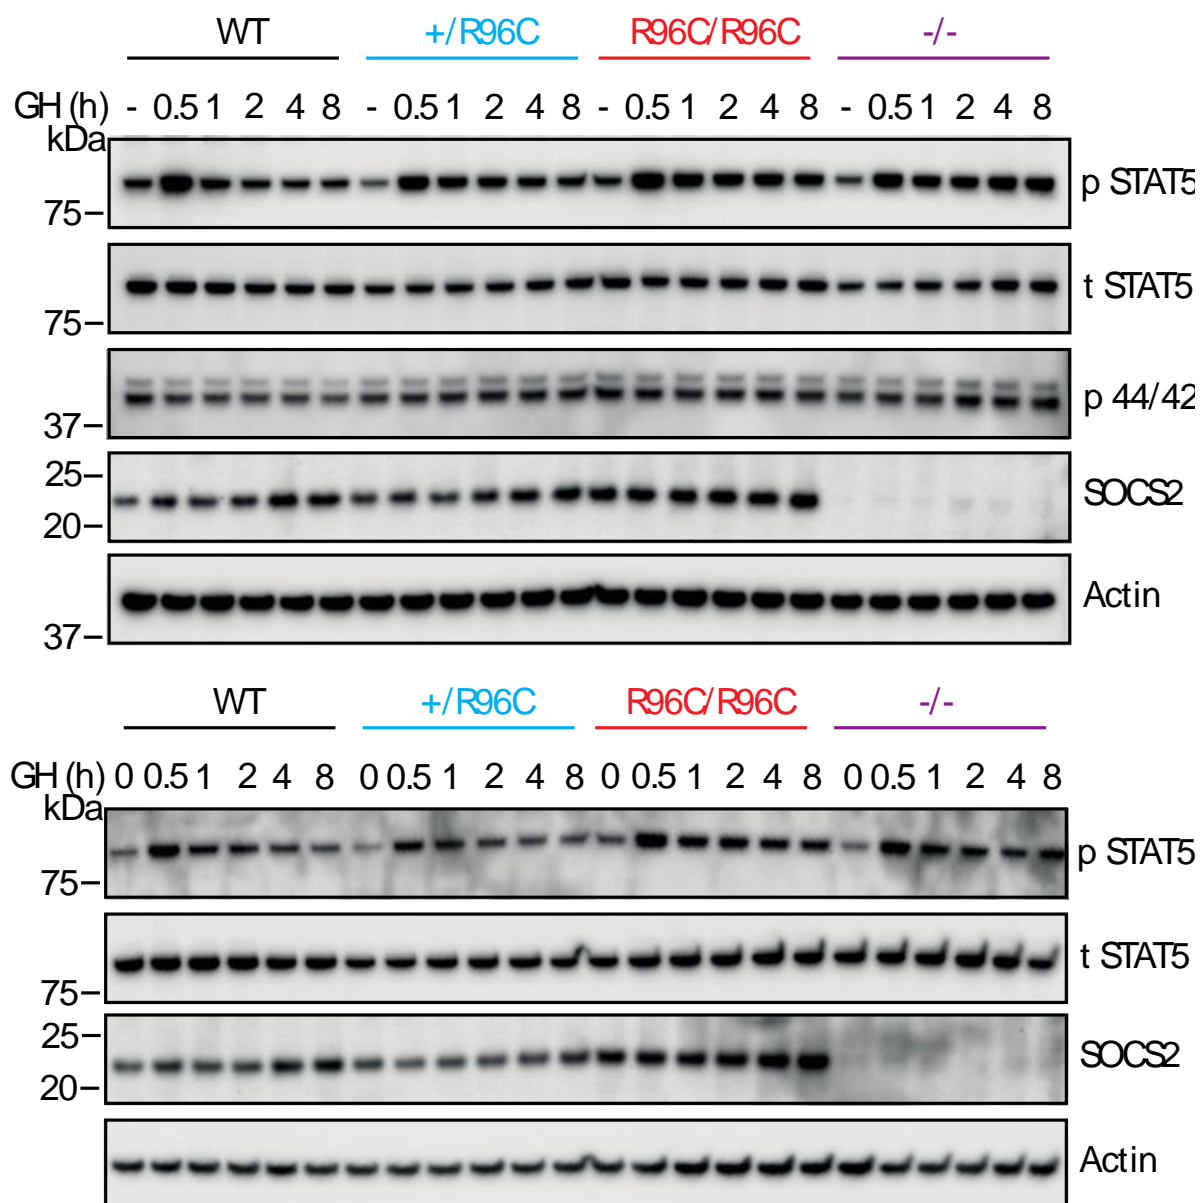

**Supplementary Figure 5. *Socs2*<sup>R96C/R96C</sup> and *Socs2*<sup>-/-</sup> MEFs display prolonged growth hormone signal activation.** *Socs2*<sup>+/+</sup>, *Socs2*<sup>R96C/+</sup>, *Socs2*<sup>R96C/R96C</sup> and *Socs2*<sup>-/-</sup> MEFs were treated with 50 ng/mL of GH, lysed and analysed by immunoblotting with antibodies to the indicated proteins. P: phosphorylated, T: total. Two additional independent experiments related to **Figure 4**.

**Supplementary Table 1. *Socs2*<sup>R96C</sup> genotyping primers.**

|                     | Allele                       | Forward Primer (5'-3')                            | Reverse Primer (5'-3')                       | PCR Product (bp) |
|---------------------|------------------------------|---------------------------------------------------|----------------------------------------------|------------------|
| Standard genotyping | <i>Socs2</i> <sup>R96C</sup> | AGCTTTCCAACCTTGTCCCCTA                            | ATCTGAATTTCCCATCTTGGTACTCAAT<br>ACAT         | 766              |
|                     | <i>Socs2</i> <sup>+/+</sup>  | GCTGGACCGACTAACCTGC                               | AGCATGGTCAGCTTAACGGAA                        | 901              |
| NGS*                |                              | GTGACCTATGAACTCAGGAGTCTGAC<br>TGTTAATGAAGCCAAAGAG | CTGAGACTTGACATCGCAGCGTGAACA<br>GTCCCATTCGGTG | 290              |

\*Next generation sequencing
